# Supplementary material for: CRISPR/Cas9-derived models of ovarian high grade serous carcinoma targeting Brca1, Pten and Nf1, and correlation with platinum sensitivity
Source: PubMed Central journal article supplement (PMC5715106; doi:10.1038/s41598-017-17119-1), 2017-12-04

# CRISPR/Cas9-derived models of ovarian high grade serous carcinoma targeting *Brca1*, *Pten* and *Nf1*, and correlation with platinum sensitivity

J.B. Walton<sup>1</sup>, M. Farquharson<sup>1</sup>, S. Mason<sup>2</sup>, J. Port<sup>2</sup>, B. Kruspig<sup>2</sup>, S. Dowson<sup>1</sup>, D. Stevenson<sup>2</sup>, D. Murphy<sup>1,2</sup>, M. Matzuk<sup>3</sup>, J. Kim<sup>4</sup>, S. Coffelt<sup>2</sup>, K. Blyth<sup>2</sup>, I.A. McNeish<sup>1\*</sup>

## Supplementary information

# Supplementary table and figure legends

## Table S1

PCR primers used for specific genes and guides

## Figure S1.

Sanger sequencing of the region around exon 12 (upper) and exon 19 (lower) of *Brca1* in the three *Trp53<sup>-/-</sup>;Brca1<sup>-/-</sup>* clones 1.26, 1.36 and 6.20. Guide RNA sequences used to generate each clone are shown in green.

## Figure S2.

ID8 *Trp53<sup>-/-</sup>* and *Trp53<sup>-/-</sup>;Brca1<sup>-/-</sup>* cells were treated with rucaparib (10  $\mu$ M) for 24h, fixed and stained for  $\gamma$ H2AX and RAD51, and counterstained with DAPI. RAD51 foci were counted in up to 30 untreated and irradiated cells. Bars represent mean ( $\pm$  SEM)  $\gamma$ H2AX (left) and RAD51 (right) foci per cell; dotted lines represents two-fold increase in  $\gamma$ H2AX and RAD51 foci/cell relative to untreated cells, suggestive of induction of DNA double strand breaks and functional homologous recombination respectively{Mukhopadhyay, 2010 #3128}.

## Figure S3.

Sanger sequencing of the region around exon 5 of *Pten* in the four *Trp53<sup>-/-</sup>;Pten<sup>-/-</sup>* clones 1.11, 1.12, 1.14 and 1.15. Guide RNA sequence used to generate the clones is shown in green.

## Figure S4.

Sanger sequencing of the region around exon 2 of *Nf1* in the two *Trp53<sup>-/-</sup>;Nf1<sup>-/-</sup>* clones 1.20, and 1.23. Guide RNA sequence used to generate the clones is shown in green.

## Figure S5.

Confocal microscopy images  $\gamma$ H2AX and RAD51 staining of *Trp53<sup>-/-</sup>;Pten<sup>-/-</sup>*, *Trp53<sup>-/-</sup>;Nf1<sup>-/-</sup>* and *Trp53<sup>-/-</sup>;Pten<sup>-/-</sup>* cells following 10Gy irradiation. See Fig. 2F for quantification.

## Figure S6.

Sanger sequencing of the region around exon 5 of *Pten* in the two *Trp53<sup>-/-</sup>;Brca2<sup>-/-</sup>;Pten<sup>-/-</sup>* clones 2.14.22 and 3.15.10. Guide RNA sequence used to generate the clones is shown in green.

## Figure S7.

$5 \times 10^6$  *Trp53<sup>-/-</sup>;Pten<sup>-/-</sup>* cells were injected intraperitoneally into female C57Bl/6 mice in groups of six. Two different clones were used. Mice were killed when they reached humane endpoints.

## Figure S8.

Results from Fig. 4D for *Trp53<sup>-/-</sup>;Brca1<sup>-/-</sup>* tumours treated with intraperitoneal cisplatin with data for clones 1.36 and 6.20 displayed separately.

**Table S1**

| <b>Gene</b>                 | <b>Forward</b>                  | <b>Reverse</b>                 |
|-----------------------------|---------------------------------|--------------------------------|
| <b><i>Brca1</i> Guide 1</b> | 5' -TTATCTCACAGTAGCGAGTC-3'     | 5' -GTCCATAGCATCTCCTTCTA-3'    |
| <b><i>Brca1</i> Guide 6</b> | 5' -TGCTAATCTGTCAAGGAACC-3'     | 5' -CCATCAGCTAGGATCTAAACC-3'   |
| <b><i>Pten</i></b>          | 5' -TACTTGACAAGAGGCCTGGG-3'     | 5' -GGTCCACAAAGAGGGAGGAA-3'    |
| <b><i>Nf1</i></b>           | 5' -GGAAAACACTGGATAGAAGATTTG-3' | 5' -GCTTCAACGGGAATAAAAACCTG-3' |

# Supplementary Figures

S1

## Brcal\_1.26 1.36

**GCAGCAGGAAATGGCT-CACC** Guide1

GTATAACCTGATAAAGCTGCAGCAGGAAATGGCT-CACCTGGAAGCTGTGCTGGAGCAG Brcal\_Palb2  
 GTATAACCTGATAAAGCTGCAGCAGGAAATGG---CACCTGGAAGCTGTGCTGGAGCAG JW01\_1.26  
 GTATAACCTGATAAAGCTGCAG-----CACCTGGAAGCTGTGCTGGAGCAG JW02\_1.26  
 GTATAACCTGATAAAGCTGCAGCAGGAAATGGCTCCACCTGGAAGCTGTGCTGGAGCAG JW02\_1.36  
 GTATAACCTGATAAAGCTGCAGCAGGAAATG-----TGAAGCTGTGCTGGAGCAG JW03\_1.36

## Brcal\_6.20

GGTTTTATTCCAGCAGCCTCATGGGTTCTCACAGCTAATTTTTAACTCCAGGTCCAAGACATATATATATATGGTACATATAACATACATT  
 GGTTTTATTCCAGCAGCCTCATGGGTTCTCACAGCTAAT-----  
 GGTTTTATTCCAGCAGCCTCATGGGTTCTCACAGCTAA-----

TAGGCAAAATACTCATAcataAAAAATAAAAAGAATGAATGTTTAAAATATATTTTCTAAGATAGGGTCTTACCTGGGTTTGGTGGCATGTCT

CTTTAATCTCAGCTCTTGGGAGAAGGCAGAGTCAGGCAGATTTCTGCATCCCAGGCCAGCCAGGCTCCACGGTCTTGTCTCCAAAAAATAA

CAAAGACAAGGTTTCATTATGTAATGCTGGCTGGCCTGGACATGAGTGTAGTGCCTTAATGCTTCGTGGCTGGGCCGTCACCCACCCCAGT

**CGATCC**

AATCACAGAGGTTTGTGTTTGGTTTCAGCATGAATTTGAAGTCAAAGGAGATGTTGTGACTGGAAGAAATCACCAAGGTCCAAGGCGATCC

**AGAGAATCCCG** Guide6

AGAGAATCCCGGAAAAGGTAAAGTCCCTCTTTATGTGACA Brcal\_BRCT2  
 -----CTTTATGTGACA JW02\_6.20  
 -----CTTTATGTGACA JW03\_6.20

S2

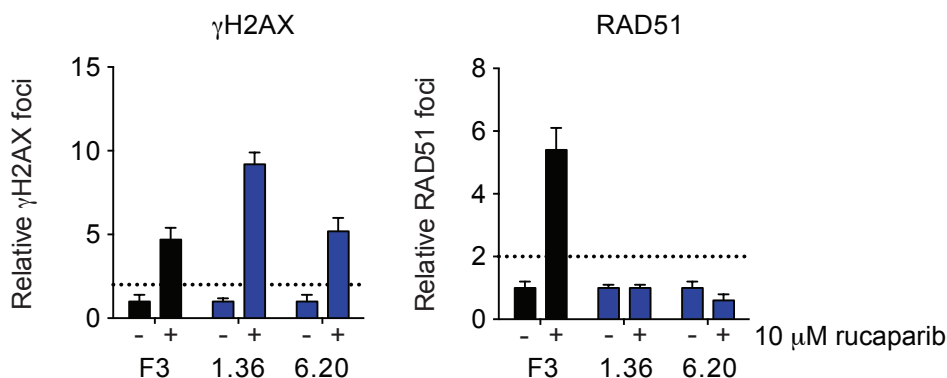

S3

Pten\_1.11 1.12

TGTGCATATTTATTGCATCG Guidel

GGTGAATGATTTGTGCATATTTATTGCATCGGGGCAAATTTTTAAAGGCACAAGAGGCCCTAGATTTTTATGGGGA Pten\_exon5  
 GGTGAATGATTTGTGCATAT-----TTTTAAAGGCACAAGAGGCCCTAGATTTTTATGGGGA JW14\_1.11  
 GGTGAATGATTTGTGCATAT-----GAGGCCCTAGATTTTTATGGGGA JW17\_1.11  
 GGTGAATGATTTGTGCATATTTAT----TCGGGGCAAATTTTTAAAGGCACAAGAGGCCCTAGATTTTTATGGGGA JW25\_1.12  
 GGTGAATGATTTGTGCATATTTATTG--TCGGGGCAAATTTTTAAAGGCACAAGAGGCCCTAGATTTTTATGGGGA JW28\_1.12

Pten\_1.14

AGTTAACCTATGTTTTAAATAAAAAATTTAAATTTTCTTACACTGGGATTATCTTTTTGCAACAGTTGCACAGTATCCTT  
 AGTTAACCTATGTTTTAAATAAAAAATTTAAATTTTCTTACACTGGGATTATCTTTTTGCAACAGTTGCACAGTATCCTT  
 AGTTAACCTATG-----

TTGAAGACCATAACCCACCACAGCTAGAACTTATCAAACCCCTTCTGTGAAGATCTTGACCAATGGCTAAGTGAAGATGACAA  
 TTGAAGACCATAACCCACCACAGCTAGAACTTATCAAACCCCTTCTGTGAAGATCTTGACCAATGGCTAAGTGAAGATGACAA  
 -----

TGTGCATATTTATTGCATCG Guidel

TCATGTTGCAGCAATTCACTGTAAAGCTGGAAAGGGACGGACTGGTGAATGATTTGTGCATATTTATTGCATCGGGGCAA  
 TCATGTTGCAGCAATTCACTGTAAAGCTGGAAAGGGACGGACTGGTGAATGATTTGT-----  
 -----

TTTTTAAAGGCACAAGAGGCCCTAGATTTTTATGGGGAAGTAAGGACCAGAGAC Pten\_exon5  
 -----GGCACAAGAGGCCCTAGATTTTTATGGGGAAGTAAGGACCAGAGAC JW39\_1.14  
 -----TTTTTATGGGGAAGTAAGGACCAGAGAC JW44\_1.14

Pten\_1.15

TGTGCATATTTATTGCATCG Guidel

GTGTAATGATTTGTGCATATTTATTGCATCGGGGCAAATTTTTAAAGG Pten\_exon5  
 GTGTAATGATTTGTGCATATTTATTGCA--GGGGCAAATTTTTAAAGG JW53\_1.15  
 GTGTAATGATTTGTGCATATTTATT----CGGGCAAATTTTTAAAGG JW56\_1.15

S4

Nf1\_1.20 1.23

AGTCAGCACCGAGCAC-AACAAGG Guidel

CACACATACCAAAGTCAGCACCGAGCAC-AACAAGGAGTGTCTGATCAACATTTCCAAATA Nf1\_exon2  
 CACACATACCAAAGTCAGCACCGAGCACAAACAAGGAGTGTCTGATCAACATTTCCAAATA JW49\_1.20  
 CACACATACCAAAGTCAGCACCGAGCA--AACAAGGAGTGTCTGATCAACATTTCCAAATA JW50\_1.20  
 CACACATACCAAAGTCAGCACCGAGCACAAACAAGGAGTGTCTGATCAACATTTCCAAATA JW01\_1.23  
 CACACATACCAAAGTCAGCACCGAGCACAAACAAGGAGTGTCTGATCAACATTTCCAAATA JW02\_1.23

S5

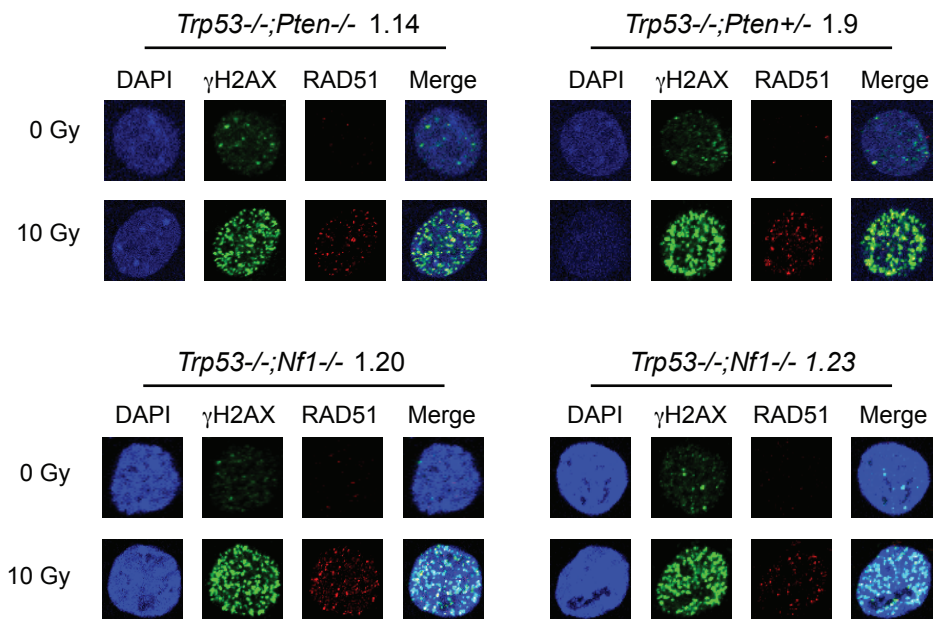

S6

**Brca2;Pten\_2.14.22 3.15.10**

TG**TG**CATATTTATTGC-ATCG Guide1  
 TTTGTGCATATTTATTGC-ATCGGGGCAA TTTTTAAAGG CACAAGAGGC 563 **Pten\_exon5**  
 TTTGTGCATA-----ATCGGGGCAA TTTTTAAAGG CACAAGAGGC 519 **JW41\_2.14.22**  
 TTT-----GGGGCAA TTTTTAAAGG CACAAGAGGC 508 **JW42\_2.14.22**  
 TTT-----GGGGCAA TTTTTAAAGG CACAAGAGGC 566 **JW11\_3.15.10**  
 TTTGTGCATATTTATTGCAATCGGGGCAA TTTTTAAAGG CACAAGAGGC 589 **JW12\_3.15.10**

S7

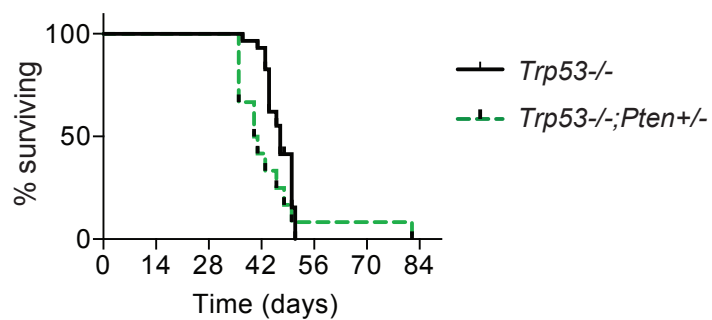

S8

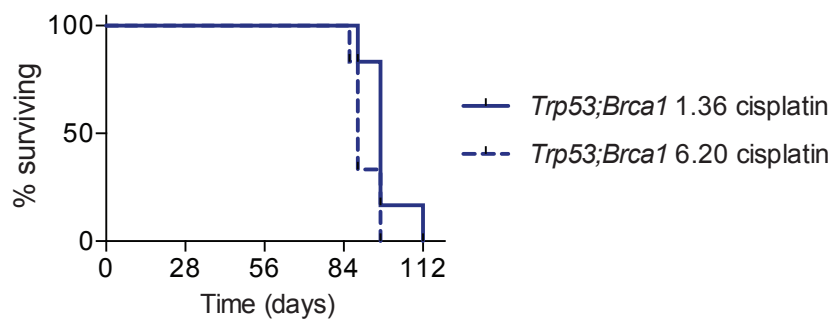

Supplement: 41598_2017_17119_MOESM1_ESM.pdf [file 41598_2017_17119_MOESM1_ESM.pdf]
